# Supplementary material
Source: Springer Nature journal article supplement (https://www.springermedizin.de/resource/supplementary/12958_2012_999_MOESM4_ESM.pdf/9566604)

Grp IIa vs. I

Grp IIb vs. I

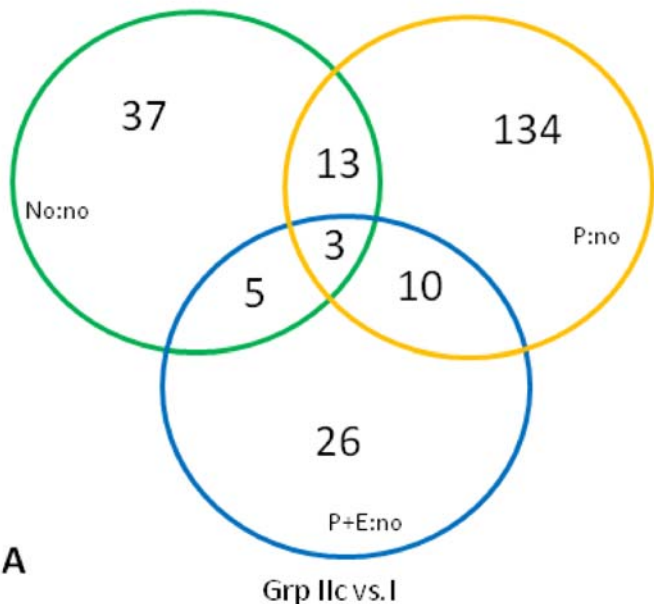

A

Day 3-5 versus day 0

Grp IIb vs. IIa

Grp IIc vs. IIa

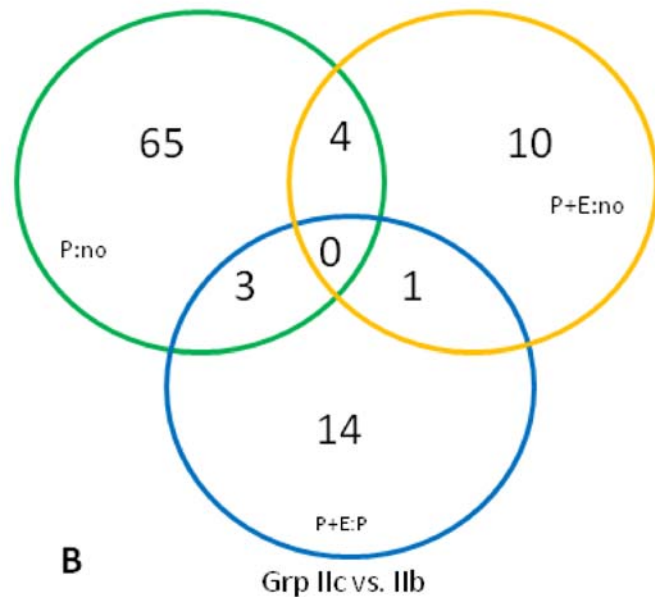

B

Day 3-5 versus day 3-5

Supplement: MOESM4 [file 9566604]
